# Supplementary material
Source: PubMed Central journal article supplement (PMC3567684)
Supplement: supp_M112.419168_jbc.M112.419168-1.pdf [file supp_M112.419168_jbc.M112.419168-1.pdf]

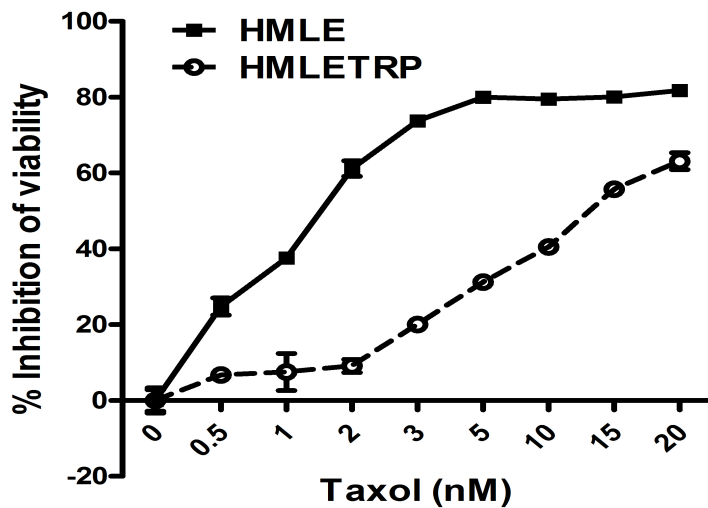

**Fig S1 HMLETRP cells are resistant to Taxol**

HMLE and HMLETRP cells were seeded into 96-well plates at a density of  $8 \times 10^3$  cells per well and then treated with different concentrations of Taxol for 48 hrs. The inhibition of cell viability was scored. Points represent the mean of three independent experiments; Bars represent SE.
