# Supplementary material
Source: PubMed Central journal article supplement (PMC3567684)
Supplement: supp_M112.419168_jbc.M112.419168-2.pdf [file supp_M112.419168_jbc.M112.419168-2.pdf]

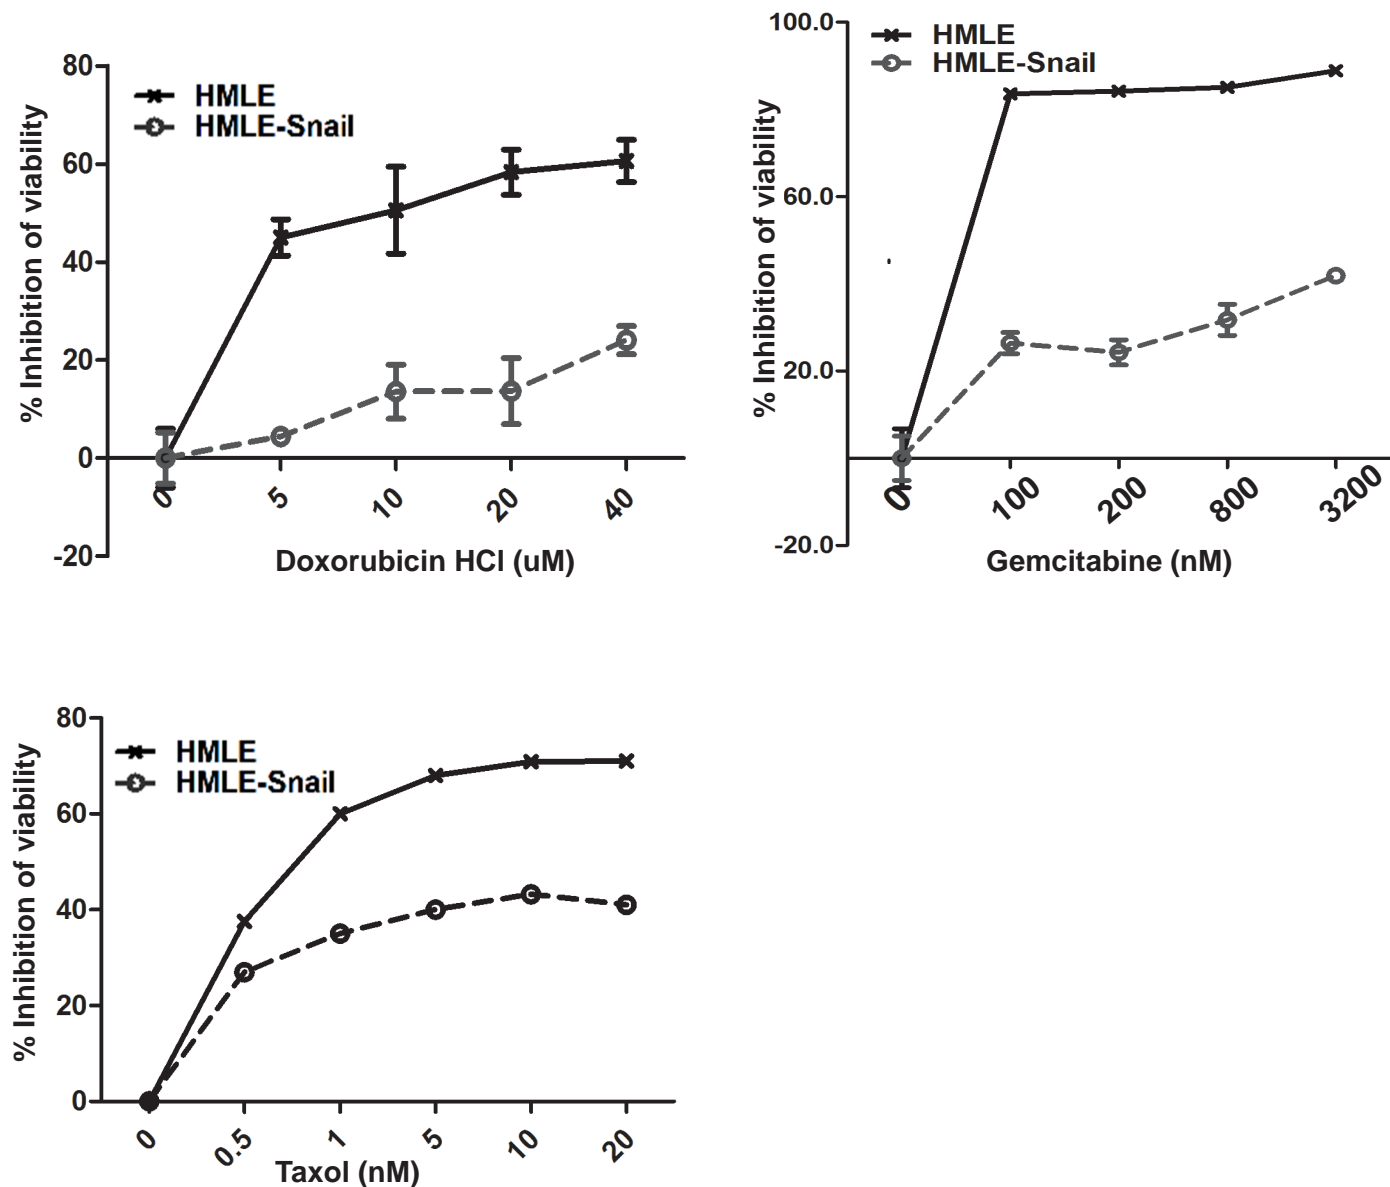

**Fig S2 Snail confers breast cancer resistance to chemotherapeutics**

HMLE-vector and HMLESnail cells were seeded into 96-well plates at a density of  $8 \times 10^3$  cells per well and then treated with different concentrations of Taxol, Gemcitabine, or Doxorubicin HCl for 48 hrs. The inhibition of cell viability was scored. Points represent the mean of three independent experiments; Bars represent SE.
