# Supplementary material
Source: PubMed Central journal article supplement (PMC3567684)
Supplement: supp_M112.419168_jbc.M112.419168-3.pdf [file supp_M112.419168_jbc.M112.419168-3.pdf]

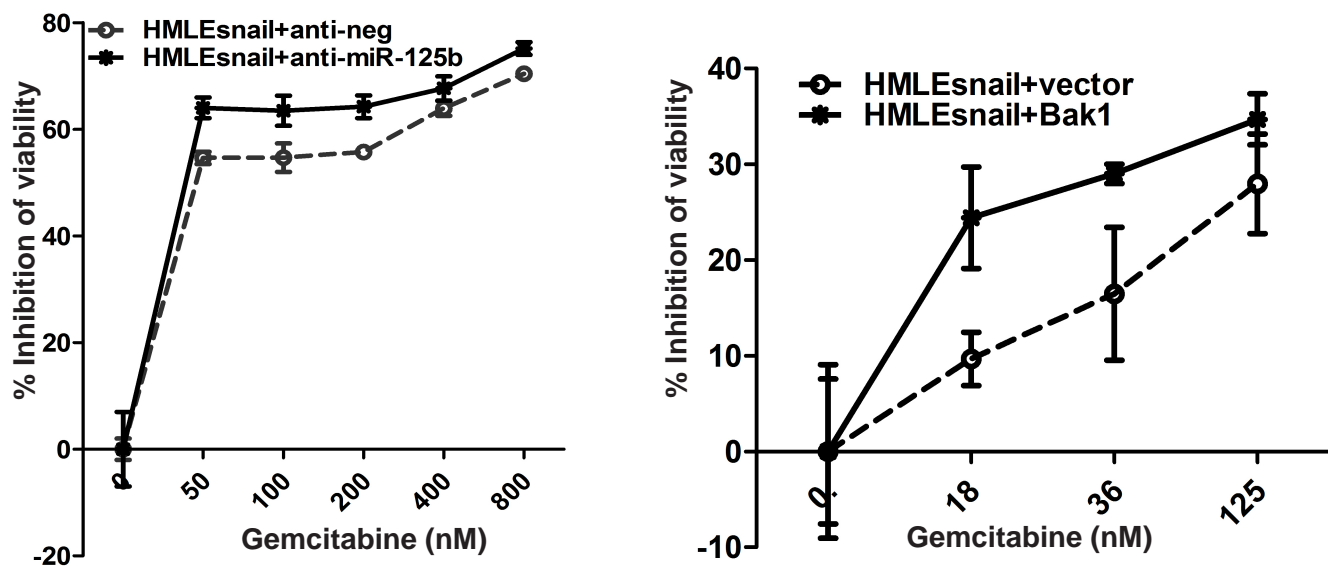

**Fig S3 Snail confers breast cancer resistance to Gemcitabine via miR-125b and Bak1**

HMLE-Snail cells were transfected with 100nM anti-neg and anti-miR-125b or 4ug puro3vector and puro3-Bak1. Twenty-four hrs after transfection, cells were seeded into 96-well plates at a density of  $5 \times 10^3$  cells per well, incubated for 8 hrs, and then treated with different concentrations of Gemcitabine. 48 hrs after treatment, viability was assessed. Bars represent SE.
