# Supplementary material
Source: PubMed Central journal article supplement (PMC3567684)
Supplement: supp_M112.419168_jbc.M112.419168-4.pdf [file supp_M112.419168_jbc.M112.419168-4.pdf]

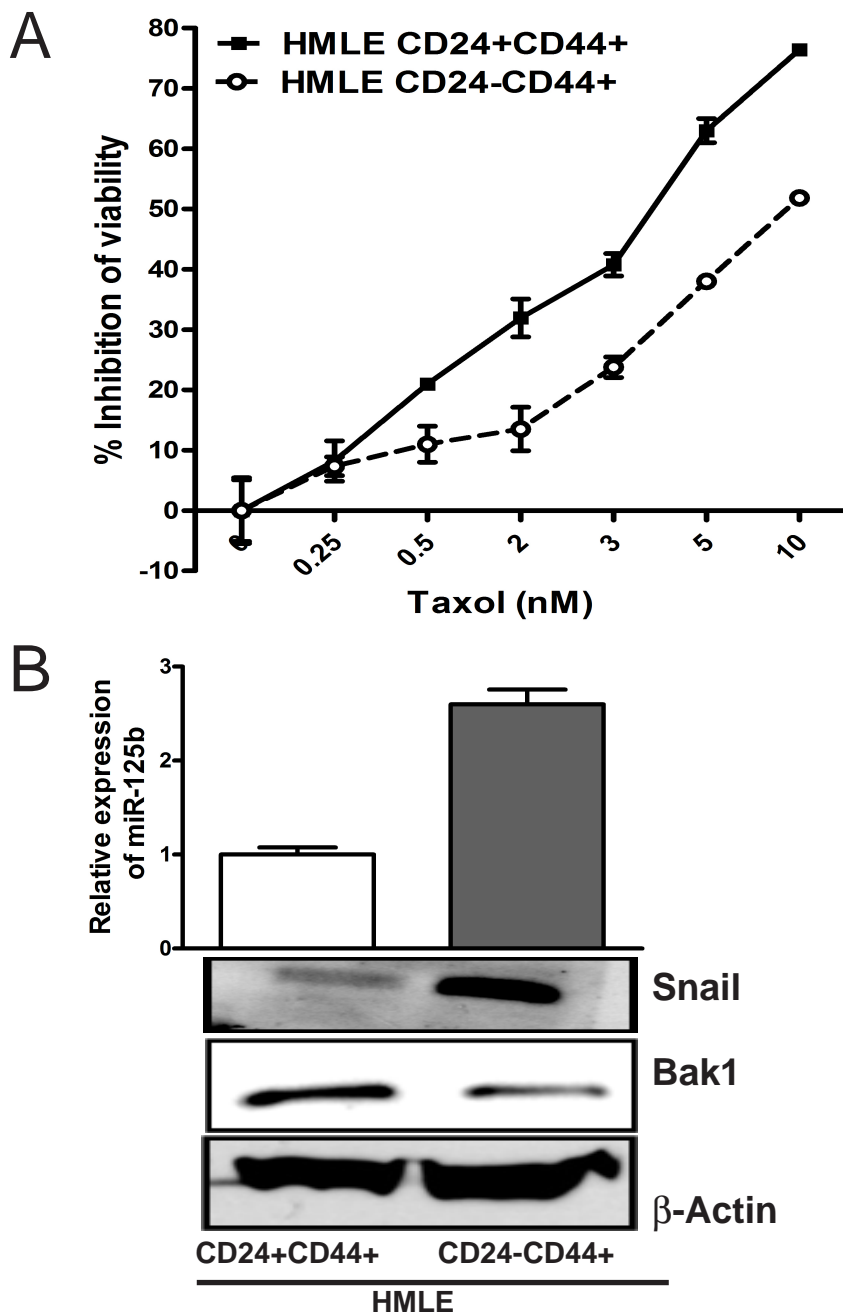

**Fig S4 A HMLE CD24-CD44+ cell population is resistant to Taxol**

HMLE CD24+CD44+ or CD24-CD44+ cells were seeded into 96-well plates at a density of  $8 \times 10^3$  cells per well and then treated with different concentrations of Taxol for 48 hrs. The inhibition of cell viability was scored. Points represent the mean of three independent experiments; Bars represent SE.

**Fig S4B Upregulation of Snail and miR-125b are associated with downregulation of Bak1**

HMLE CD24+CD44+ and CD24-CD44+ cells were harvested. Cell lysates were prepared for Western blotting with antibodies against Snail, Bak1, and beta-actin.
