# Supplementary material
Source: PubMed Central journal article supplement (PMC3567684)
Supplement: supp_M112.419168_jbc.M112.419168-5.pdf [file supp_M112.419168_jbc.M112.419168-5.pdf]

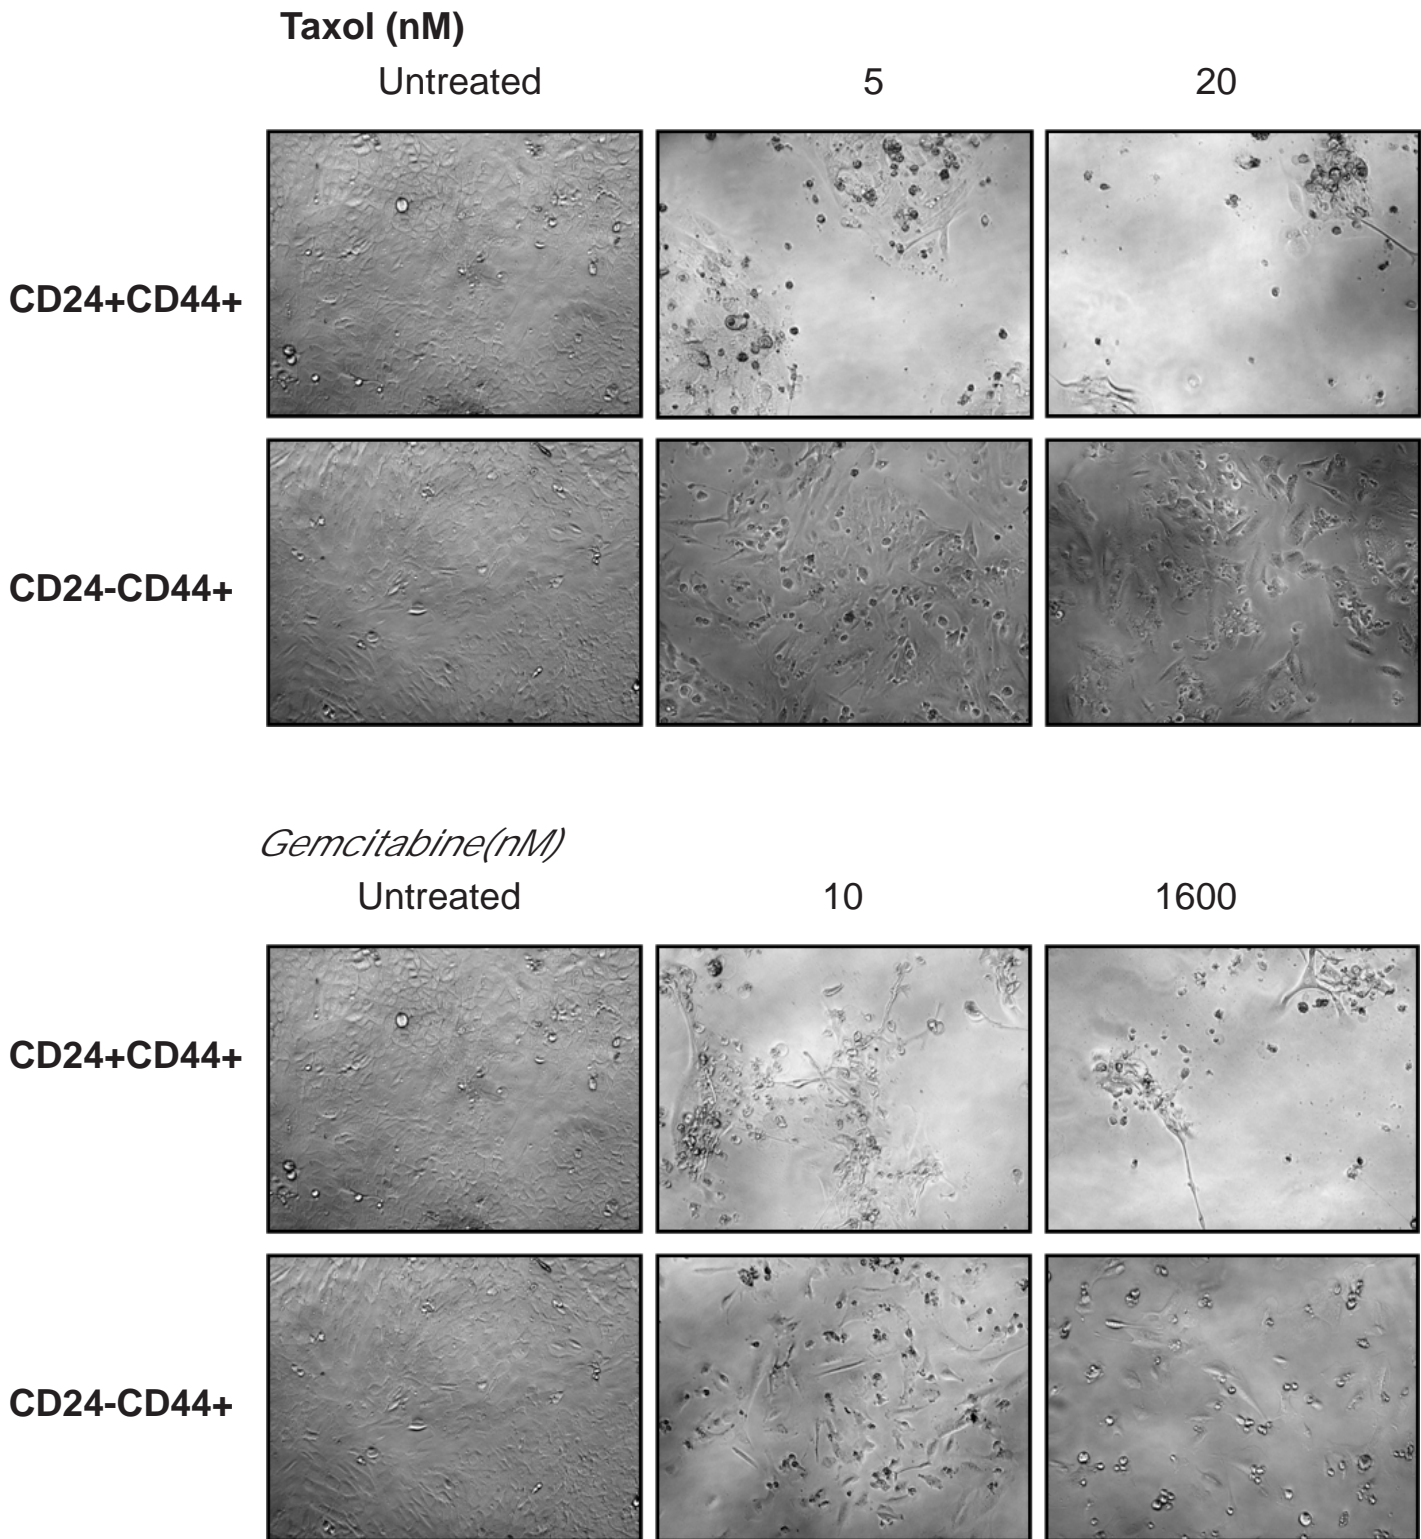

**Fig S5 Stem cell population is resistant to chemotherapeutics**

HMLE-CD24+CD44 and HMLE-CD24-CD44 cells were seeded into 96-well plates at a density of  $8 \times 10^3$  cells per well and then treated with different concentrations of Taxol and Gemcitabine for 48 hrs. Pictures were taken at different concentrations of drugs(10x).
