# Supplementary material
Source: PubMed Central journal article supplement (PMC3567684)
Supplement: supp_M112.419168_jbc.M112.419168-6.pdf [file supp_M112.419168_jbc.M112.419168-6.pdf]

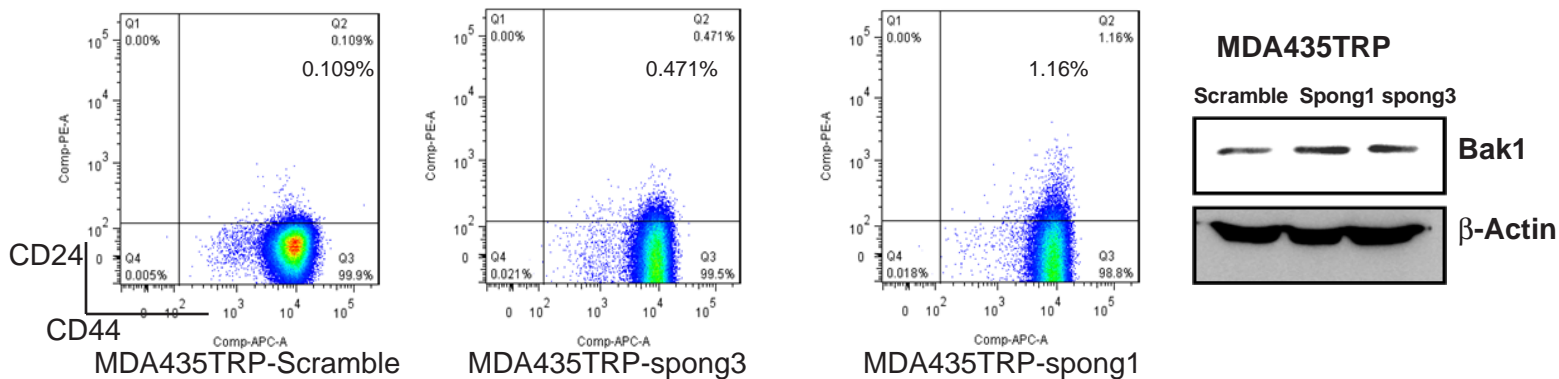

**Fig S6 Inhibition of miR-125b increases the non-stem cell pool in breast cancer cells**  
 MDA435TRP scrambled-spong, MDA435TRP-miR-125b-spong3, and MDA435TRP-miR-125b-spong1 cells were incubated with CD24 and CD44 for 45min, washed, and then analyzed by flow cytometry. Cell lysates of MDA435TRP scrambled-spong, MDA435TRP-miR-125b-spong3, and MDA435TRP miR-125b-spong1 were prepared for Western blotting. Antibodies against Bak1 and beta-actin were used.
